# Supplementary material
Source: PubMed Central journal article supplement (PMC4712388)
Supplement: aasm.39.2.405s1.pdf [file aasm.39.2.405s1.pdf]

**Table S1. Demographics and clinical features of RLS subjects.**

Demographics, RLS characteristics, and treatment of PD subjects presenting RLS at the time of diagnosis (prevalent RLS) or developing RLS during the course of the disease (incident RLS) are reported (\*: below normal values).

| <i>RLS Subjects</i>               |                          | <i>Prevalent RLS</i> |      |      |      |      | <i>Incident RLS</i> |      |      |      |       |       |      |      |      |      |      |       |      |      |      |      |
|-----------------------------------|--------------------------|----------------------|------|------|------|------|---------------------|------|------|------|-------|-------|------|------|------|------|------|-------|------|------|------|------|
| <b>Gender</b>                     |                          | M                    | M    | M    | F    | M    | M                   | F    | M    | M    | M     | F     | M    | M    | F    | M    | F    | F     | M    | M    | F    | F    |
| <b>Age at PD diagnosis, years</b> |                          | 65                   | 68   | 53   | 54   | 45   | 67                  | 58   | 62   | 72   | 59    | 46    | 67   | 54   | 56   | 49   | 51   | 70    | 71   | 74   | 63   | 71   |
| <b>IRLSSG rating scale</b>        | <i>baseline</i>          | 16                   | 14   | 9    | 15   | 8    | -                   | -    | -    | -    | -     | -     | -    | -    | -    | -    | -    | -     | -    | -    | -    | -    |
|                                   | <i>2-years</i>           | -                    | 15   | -    | -    | -    | -                   | 18   | 9    | -    | -     | -     | 8    | 9    | -    | 11   | -    | -     | 8    | -    | -    | -    |
|                                   | <i>4-years</i>           | -                    | 13   | -    | -    | -    | 8                   | 15   | -    | 9    | 9     | 10    | 9    | 7    | 13   | 10   | 12   | 14    | 8    | 16   | 18   | 11   |
| <b>RLS family history</b>         |                          | No                   | Yes  | No   | No   | Yes  | No                  | No   | No   | No   | No    | No    | No   | No   | No   | No   | No   | No    | No   | No   | No   | No   |
| <b>Laboratory values</b>          | <i>Iron, ng/mL</i>       | 45                   | 104  | 173  | 121  | 165  | 110                 | 115  | 92   | 108  | 120   | 27    | 109  | 119  | 88   | 82   | 51   | 57    | 76   | 103  | 111  | 89   |
|                                   | <i>Ferritin, ng/mL</i>   | 25                   | 274  | 217  | 198  | 215  | 174                 | 190  | 155  | 90   | 125   | 57    | 106  | 108  | 112  | 98   | 78   | 81    | 91   | 130  | 155  | 222  |
|                                   | <i>Haemoglobin, g/dL</i> | 13.1*                | 14.6 | 17.3 | 13.9 | 16.5 | 15.6                | 13.7 | 16.0 | 14.4 | 13.1* | 10.6* | 15.3 | 15.0 | 13.9 | 15.4 | 13.2 | 11.7* | 14.2 | 16.1 | 15.9 | 14.4 |
|                                   | <i>Creatinine, mg/dL</i> | 1.3                  | 1.0  | 0.9  | 0.7  | 0.9  | 1.0                 | 0.7  | 0.9  | 1.0  | 0.7   | 0.9   | 1.2  | 1.0  | 1.0  | 1.1  | 1.0  | 0.7   | 1.0  | 0.7  | 0.6  | 0.8  |
| <b>Motor subtype</b>              |                          | TD                   | PIGD | PIGD | TD   | ND   | TD                  | ND   | TD   | TD   | ND    | TD    | TD   | ND   | TD   | TD   | TD   | TD    | TD   | PIGD | TD   | ND   |
| <b>L-Dopa, mg/day</b>             | <i>2-years</i>           | 300                  | -    | -    | -    | -    | 150                 | 300  | -    | 200  | -     | 250   | 300  | 400  | -    | 300  | -    | 400   | -    | 200  | -    | 400  |
|                                   | <i>4-years</i>           | 450                  | 300  | 300  | -    | -    | 250                 | 400  | 200  | 400  | 300   | 400   | 500  | 400  | -    | 500  | 100  | 400   | 200  | 300  | 100  | 500  |
| <b>DA agonist, type</b>           | <i>2-years</i>           | PM                   | PM   | -    | PM   | PM   | -                   | PM   | RP   | -    | PM    | PM    | -    | PM   | PM   | PM   | PM   | -     | PM   | -    | PM   | -    |
|                                   | <i>4-years</i>           | -                    | PM   | -    | PM   | PM   | -                   | -    | RP   | PM   | PM    | -     | PM   | PM   | PM   | -    | PM   | PM    | -    | -    | PM   | -    |
| <b>MAO-B, type</b>                | <i>2-years</i>           | RA                   | -    | SE   | RA   | -    | RA                  | -    | -    | -    | -     | -     | -    | -    | RA   | -    | RA   | -     | RA   | RA   | RA   | -    |
|                                   | <i>4-years</i>           | RA                   | RA   | SE   | RA   | SE   | RA                  | -    | RA   | -    | -     | RA    | -    | -    | RA   | SE   | RA   | RA    | RA   | RA   | RA   | -    |
| <b>LEDD</b>                       | <i>2-years</i>           | 452                  | 105  | 50   | 310  | 205  | 250                 | 510  | 80   | 210  | 210   | 460   | 300  | 610  | 210  | 510  | 205  | 400   | 205  | 300  | 310  | 400  |
|                                   | <i>4-years</i>           | 550                  | 505  | 350  | 415  | 305  | 350                 | 610  | 380  | 452  | 405   | 500   | 605  | 610  | 310  | 810  | 305  | 605   | 405  | 400  | 410  | 500  |

|                        |                |    |   |   |   |   |   |     |     |   |   |   |   |   |    |     |   |   |   |   |   |
|------------------------|----------------|----|---|---|---|---|---|-----|-----|---|---|---|---|---|----|-----|---|---|---|---|---|
| <b>Antidepressants</b> | <i>2-years</i> | -  | - | - | - | - | - | SER | -   | - | - | - | - | - | -  | SER | = | = | = | = | = |
|                        | <i>4-years</i> | ES | - | - | - | - | - | -   | SER | - | - | - | - | - | ES | -   | - | = | = | = | = |
| <b>Clonazepam (mg)</b> | <i>2-years</i> | -  | - | - | - | - | - | 10  | -   | - | - | - | - | - | -  | -   | = | = | = | = | = |
|                        | <i>4-years</i> | -  | - | - | - | - | - | -   | -   | - | - | - | - | - | -  | -   | = | = | = | = | = |

RLS: restless legs syndrome; PD: Parkinson's disease; M: male; F: female; IRLSSG rating scale: International RLS Study Group rating scale; TD: tremor dominant phenotype; ND: not determined/mixed phenotype; PIGD: postural instability gait disorder phenotype; UPDRS: Unified Parkinson's Disease Rating Scale; DA: dopamine; IMAO-B: mono-amino-oxidase-B inhibitor; PM: pramipexole; RP: ropinirole; RA: rasagiline; SE: selegiline; LEDD: L-dopa equivalent daily dosage; SER: sertraline; ES: escitalopram.
